# Supplementary material for: Excess Mortality in Patients with Severe Mental Disorders in 1996-2010 in Finland
Source: PLoS One. 2016 Mar 24;11(3):e0152223. doi: 10.1371/journal.pone.0152223 (PMC4807083; doi:10.1371/journal.pone.0152223)
Supplement: S3 Dataset — The sensitivity analyses for the rate ratios (RR) and 95% confidence intervals of the excess mortality in patients with severe mental disorders (SMD) compared to the total population by gender, cause-of-death groups, and the SMD categories (patients with psychotic disorders [PD], psychoactive substance use disorders [PSD], and mood disorders [MD]) in the periods 1996–98, 1999–2001, 2002–04, 2005–07 and 2008–10 in Finland. Only patients with hospitalisations due to SMDs from a preceding period of five years or during the particular study year included. (XLSX) [file pone.0152223.s003.xlsx]

## Sheet: MEN
RATE RATIOS (RR) AND 95% CONFIDENCE INTERVALS
Patients with psychotic disorders
	all-cause mortality RR	lower limit	upper limit		amenable RR	lower limit	upper limit		IHD RR	lower limit	upper limit		disease RR	lower limit	upper limit		alchohol mortality RR	lower limit	upper limit
1996-1998	3.71602	3.02979	4.55769		5.39632	3.43791	8.47033		3.44873	2.35754	5.045		3.23757	2.57336	4.07323		1.83577	0.81347	4.1428
1999-2001	3.88075	3.15473	4.77385		4.50774	2.68852	7.55797		3.81194	2.60832	5.571		3.41731	2.70665	4.31457		2.22159	0.98799	4.9954
2002-2004	3.9946	3.25344	4.90461		4.97208	3.00758	8.21976		3.68619	2.45752	5.5291		3.53758	2.81323	4.44843		1.67266	0.65458	4.2742
2005-2007	3.71027	3.00153	4.58635		3.89097	2.14966	7.04279		3.63101	2.35063	5.6088		3.34565	2.64406	4.23341		2.52246	1.26319	5.0371
2008-2010	4.17692	3.39406	5.14036		4.38068	2.39301	8.01932		4.32489	2.87158	6.5137		3.74035	2.97287	4.70596		2.38472	1.20354	4.7252
Patients with psychoactive substance use disorders
	all-cause mortality RR	lower limit	upper limit		amenable RR	lower limit	upper limit		IHD RR	lower limit	upper limit		disease RR	lower limit	upper limit		alchohol mortality RR	lower limit	upper limit
1996-1998	5.2869	4.72903	5.9106		4.60003	3.32849	6.35733		3.2171	2.54397	4.0682		4.22103	3.71007	4.8024		19.0068	15.1218	23.89
1999-2001	5.688	5.10005	6.3438		4.96517	3.64224	6.76863		3.6022	2.84352	4.5633		4.61855	4.07293	5.2372		19.7931	15.9663	24.537
2002-2004	5.9394	5.31654	6.6352		5.50586	3.98749	7.60239		3.8629	3.04954	4.8931		4.84123	4.26649	5.4934		19.7911	16.0973	24.333
2005-2007	6.9297	6.23919	7.6967		5.64545	4.08854	7.79523		4.8027	3.80888	6.0557		5.56509	4.92971	6.2824		20.5357	17.1176	24.636
2008-2010	6.9824	6.27775	7.7662		5.45244	3.82839	7.76544		5.4372	4.35469	6.7887		5.7477	5.09922	6.4786		20.3593	16.9998	24.383
Patients with mood disorders
	all-cause mortality RR	lower limit	upper limit		amenable RR	lower limit	upper limit		IHD RR	lower limit	upper limit		disease RR	lower limit	upper limit		alchohol mortality RR	lower limit	upper limit
1996-1998	3.301	2.58824	4.21004		2.88205	1.53695	5.40434		1.96897	1.1522	3.36474		2.18879	1.62354	2.95083		2.5512	1.04577	6.22378
1999-2001	3.16461	2.47923	4.03947		3.06006	1.6255	5.76066		1.93213	1.1813	3.16019		2.15089	1.60882	2.87558		2.15164	0.84384	5.48629
2002-2004	2.85034	2.17808	3.73009		2.69331	1.3643	5.31696		2.24951	1.35414	3.73689		2.07969	1.52406	2.8379		1.67872	0.63088	4.46694
2005-2007	2.83709	2.16363	3.72019		3.26857	1.60272	6.66589		1.9649	1.07916	3.57761		2.06156	1.50972	2.81512		1.96361	0.82108	4.69596
2008-2010	3.09144	2.35368	4.06045		2.43321	1.03241	5.73464		2.05276	1.07213	3.93032		2.0461	1.44931	2.88862		1.71872	0.68395	4.31902

## Sheet: WOMEN
RATE RATIOS (RR) AND 95% CONFIDENCE INTERVALS
Patients with psychotic disorders
	all-cause mortality RR	lower limit	upper limit		amenable RR	lower limit	upper limit		IHD RR	lower limit	upper limit		disease RR	lower limit	upper limit		alchohol mortality RR	lower limit	upper limit
1996-1998	4.23746	3.35303	5.35518		3.1036	1.90659	5.05212		5.18947	3.40503	7.9091		3.43443	2.66572	4.42483		3.34201	0.9482	11.7792
1999-2001	4.56651	3.6224	5.7567		3.5969	2.24639	5.75933		4.95381	2.92846	8.3799		3.88479	3.02121	4.99521		3.44947	1.11889	10.6345
2002-2004	4.47547	3.50817	5.70949		3.03798	1.77406	5.20237		6.93466	4.36738	11.0111		3.81124	2.92778	4.96129		3.12441	1.01872	9.5826
2005-2007	4.66007	3.66759	5.9211		4.10698	2.50458	6.7346		6.67784	3.94662	11.2992		3.97837	3.07008	5.15537		2.06218	0.64712	6.5716
2008-2010	4.58667	3.56563	5.9001		3.3955	1.98824	5.79882		6.42117	3.54675	11.6251		3.8429	2.91567	5.065		2.649	0.86165	8.1439
Patients with psychoactive substance use disorders
	all-cause mortality RR	lower limit	upper limit		amenable RR	lower limit	upper limit		IHD RR	lower limit	upper limit		disease RR	lower limit	upper limit		alchohol mortality RR	lower limit	upper limit
1996-1998	8.7528	6.74143	11.3643		4.6368	2.38296	9.02235		6.4848	3.44637	12.202		6.98705	5.23111	9.3324		71.7801	43.8972	117.374
1999-2001	8.7467	6.82213	11.2141		4.86268	2.54523	9.29019		7.1561	3.98189	12.8608		6.52753	4.86185	8.7639		65.2765	40.9289	104.108
2002-2004	8.8847	6.9883	11.2958		5.35661	3.06324	9.36696		6.7656	3.57196	12.8146		7.04673	5.3667	9.2527		61.8766	40.8618	93.699
2005-2007	10.7962	8.6573	13.4635		4.76938	2.43921	9.32554		10.0404	5.50245	18.321		8.3525	6.46485	10.7913		59.0174	40.9246	85.109
2008-2010	10.5502	8.44656	13.1779		4.99272	2.66201	9.3641		7.2927	3.78912	14.036		7.8787	6.10561	10.1667		58.1322	40.2253	84.011
Patients with mood disorders
	all-cause mortality RR	lower limit	upper limit		amenable RR	lower limit	upper limit		IHD RR	lower limit	upper limit		disease RR	lower limit	upper limit		alchohol mortality RR	lower limit	upper limit
1996-1998	3.77576	2.92256	4.87805		2.87834	1.75739	4.7143		3.06084	1.81873	5.15128		2.65774	2.0119	3.51088		2.03364	0.53633	7.71113
1999-2001	3.74613	2.89955	4.83989		2.67479	1.56251	4.57884		3.45964	2.17763	5.49638		2.62784	1.97291	3.50019		3.6618	1.40372	9.55232
2002-2004	3.36962	2.57333	4.41232		2.67613	1.49541	4.78908		3.29463	1.92127	5.64968		2.40316	1.76855	3.26548		1.7579	0.46741	6.61139
2005-2007	3.26383	2.44611	4.3549		1.93698	0.90969	4.12438		2.73253	1.2987	5.74939		2.11018	1.48912	2.99026		2.23278	0.76174	6.54464
2008-2010	3.28396	2.46096	4.38218		2.44518	1.25611	4.75988		2.3441	0.96399	5.70007		2.41387	1.73701	3.35449		1.74987	0.55114	5.5558
