# Supplementary material for: Excess Mortality in Patients with Severe Mental Disorders in 1996-2010 in Finland
Source: PLoS One. 2016 Mar 24;11(3):e0152223. doi: 10.1371/journal.pone.0152223 (PMC4807083; doi:10.1371/journal.pone.0152223)
Supplement: S4 Dataset — The rate ratios (RR) and 95% confidence intervals of the excess mortality in patients with PDs comorbid with PSDs compared to patients with PDs without PSDs by gender and cause-of-death groups in the periods 1996–98, 1999–2001, 2002–04, 2005–07 and 2008–10 in Finland. (XLSX) [file pone.0152223.s004.xlsx]

## Sheet: MEN
RATE RATIOS (RR) AND 95% CONFIDENCE INTERVALS
year	all-cause mortality RR	lower limit	upper limit		amenable mortality RR	lower limit	upper limit		IHD mortality RR	lower limit	upper limit		disease mortality RR	lower limit	upper limit		alchohol mortality RR	lower limit	upper limit
1996-98	1.26987	0.79905	2.01811		1.11686	0.38462	3.24314		0.7808	0.2886	2.11244		1.07335	0.61303	1.87931		5.695	1.4573	22.255
1999-2001	1.39276	0.91534	2.11918		1.26732	0.41543	3.86618		0.95082	0.41753	2.16522		1.11371	0.66879	1.85462		9.9068	2.39517	40.977
2002-04	1.48994	1.00481	2.20929		1.20829	0.42262	3.4545		1.37437	0.63722	2.96427		1.21406	0.75758	1.94559		9.5192	2.64717	34.231
2005-07	1.59556	1.09653	2.3217		1.23309	0.44875	3.38829		1.04018	0.47152	2.29466		1.35241	0.8888	2.05782		10.8161	3.32259	35.21
2008-10	1.77259	1.25956	2.49459		1.47119	0.51049	4.23985		1.26785	0.66206	2.42794		1.55689	1.06792	2.26976		11.4414	3.81391	34.323

## Sheet: WOMEN
RATE RATIOS (RR) AND 95% CONFIDENCE INTERVALS
year	all-cause mortality RR	lower limit	upper limit		amenable mortality RR	lower limit	upper limit		IHD mortality RR	lower limit	upper limit		disease mortality RR	lower limit	upper limit		alchohol mortality RR	ll	ul
1996-98	1.69168	0.79584	3.59592		0.45357	0.07287	2.82309		1.52797	0.52657	4.4338		1.35872	0.53534	3.44846		22.8695	3.17642	164.656
1999-2001	1.78855	0.92036	3.47571		2.12444	0.6242	7.23045		1.51527	0.39856	5.76082		1.55301	0.73549	3.27923		7.6857	1.55223	38.055
2002-04	2.22233	1.21154	4.07644		2.18722	0.56548	8.45988		1.87794	0.56914	6.19644		2.06512	1.04169	4.09404		19.3581	3.1894	117.494
2005-07	2.22291	1.27333	3.88065		2.07118	0.6636	6.46445		1.77878	0.51074	6.19506		1.94528	1.02738	3.6833		16.139	3.82162	68.157
2008-10	2.10513	1.20516	3.67716		1.66142	0.55744	4.95177		2.10407	0.65588	6.74988		1.68171	0.90305	3.13179		11.3566	2.64069	48.84
